# Supplementary material
Source: PubMed Central journal article supplement (PMC3534779)
Supplement: NIHMS424505-supplement-01.pdf [file NIHMS424505-supplement-01.pdf]

Type of file: table

Label: Table S1cmbPCMR

Filename: 2011-1015-LIBPB-405 TableS1cmbPCMR.doc

### Taqman Expression Assays Used

| Gene Name     | Assay ID      |
|---------------|---------------|
| <b>Human</b>  |               |
| <i>ABCB5</i>  | Hs00698751_m1 |
| <i>ACTB</i>   | 4333762F      |
| <i>AXIN2</i>  | Hs01063168_m1 |
| <i>BCL2</i>   | Hs00153350_m1 |
| <i>BMP2</i>   | Hs00154192_m1 |
| <i>BMP4</i>   | Hs00370078_m1 |
| <i>BMPR1A</i> | Hs01034913_g1 |
| <i>BMPR1B</i> | Hs00176144_m1 |
| <i>BMPR2</i>  | Hs00176148_m1 |
| <i>CDH1</i>   | Hs01013953_m1 |
| <i>CDH2</i>   | Hs00983062_m1 |
| <i>CDH5</i>   | Hs00174344_m1 |
| <i>CDH6</i>   | Hs00191832_m1 |
| <i>CDH7</i>   | Hs00189053_m1 |
| <i>CD133</i>  | Hs01009250_m1 |
| <i>CXCR4</i>  | Hs00237052_m1 |
| <i>EDN1</i>   | Hs01115919_m1 |
| <i>EDN2</i>   | Hs00266516_m1 |
| <i>EDN3</i>   | Hs00171177_m1 |
| <i>EDNRA</i>  | Hs03988672_m1 |
| <i>EDNRB</i>  | Hs00240747_m1 |
| <i>EFNB2</i>  | Hs00187950_m1 |
| <i>EPHA2</i>  | Hs00171656_m1 |
| <i>EPHA4</i>  | Hs00953178_m1 |
| <i>EPHB2</i>  | Hs01031827_m1 |
| <i>EPHB4</i>  | Hs00174752_m1 |
| <i>ERBB2</i>  | Hs01001599_m1 |
| <i>ERBB3</i>  | Hs00951455_m1 |
| <i>ERBB4</i>  | Hs00171783_m1 |
| <i>FGF2</i>   | Hs00266645_m1 |
| <i>FGFR1</i>  | Hs00241111_m1 |
| <i>FOXD3</i>  | Hs00255287_s1 |
| <i>GAPDH</i>  | 4333764F      |
| <i>GLI1</i>   | Hs00171790_m1 |
| <i>GJA1</i>   | Hs00748445_s1 |
| <i>KDR</i>    | Hs00911700_m1 |
| <i>KIT</i>    | Hs00174029_m1 |
| <i>KITLG</i>  | Hs00241497_m1 |
| <i>KLF4</i>   | Hs00358836_m1 |
| <i>LRP5</i>   | Hs00182031_m1 |
| <i>LRP6</i>   | Hs00233935_m1 |
| <i>MLANA</i>  | Hs00194133_m1 |
| <i>MITF</i>   | Hs01117294_m1 |
| <i>MMP2</i>   | Hs00234422_m1 |
| <i>MSX1</i>   | Hs00427183_m1 |

|               |               |
|---------------|---------------|
| <b>MYB</b>    | Hs00193527_m1 |
| <b>MYC</b>    | Hs00153408_m1 |
| <b>NANOG</b>  | Hs02387400_g1 |
| <b>NEDD9</b>  | Hs00610590_m1 |
| <b>NES</b>    | Hs00707120_s1 |
| <b>NOTCH4</b> | Hs00965897_m1 |
| <b>NRP1</b>   | Hs00826121_m1 |
| <b>NRP2</b>   | Hs00187290_m1 |
| <b>OCT4</b>   | Hs00742896_s1 |
| <b>PAX3</b>   | Hs00240950_m1 |
| <b>PLXNA1</b> | Hs00413698_m1 |
| <b>PLXNA2</b> | Hs00257877_m1 |
| <b>PLXNA4</b> | Hs00326001_m1 |
| <b>RHOA</b>   | Hs01051295_m1 |
| <b>ROBO1</b>  | Hs00268049_m1 |
| <b>ROBO2</b>  | Hs00326067_m1 |
| <b>RPLP0</b>  | 4333761F      |
| <b>SIP1</b>   | Hs00186207_m1 |
| <b>SHH</b>    | Hs00179843_m1 |
| <b>SNAI2</b>  | Hs00161904_m1 |
| <b>SNAI1</b>  | Hs00195591_m1 |
| <b>SOX2</b>   | Hs01053049_s1 |
| <b>SOX9</b>   | Hs00165814_m1 |
| <b>SOX10</b>  | Hs00366918_m1 |
| <b>TUBB3</b>  | Hs00964965_m1 |
| <b>TWIST1</b> | Hs00361186_m1 |
| <b>WNT3A</b>  | Hs01055707_m1 |
| <b>ZEB1</b>   | Hs00611018_m1 |
| <b>Chick</b>  |               |
| <b>18S</b>    | 4352930E      |
| <b>AQP1</b>   | Gg03358589_m1 |
| <b>CFC1B</b>  | Gg03338500_m1 |
| <b>CXCR4</b>  | AI5IOS0       |
| <b>EPHA2</b>  | AIMSF5V       |
| <b>GAPDH</b>  | Gg03346982_m1 |
| <b>KRT15</b>  | Gg03345598_m1 |
| <b>KRT19</b>  | Gg03348102_m1 |
| <b>MITF</b>   | Gg03348224_m1 |
| <b>NEDD9</b>  | Gg03310488_m1 |
| <b>NRP1</b>   | Gg03371276_m1 |
| <b>NRP2</b>   | Gg03364413_m1 |
| <b>RHOA</b>   | Gg03338538_m1 |
| <b>RHOB</b>   | Gg03339342_s1 |
| <b>SNAI2</b>  | Gg03333502_m1 |

Type of file: table

Label: Table S2cmbPCMR

Filename: 2011-1015-LIBPB-405 TableS2\_resultsSummary\_PCMR\_cmb.doc

**Table S2. A Summary of the Gene Expression Comparisons Performed**

| Comparison                                                                | Rationale                                                                                                                                    | Summary of Findings                                                                                                                                                                                                                                               | Figures          |
|---------------------------------------------------------------------------|----------------------------------------------------------------------------------------------------------------------------------------------|-------------------------------------------------------------------------------------------------------------------------------------------------------------------------------------------------------------------------------------------------------------------|------------------|
| <b>transplanted cells to cultured cells</b>                               | evaluate effects of embryonic neural crest microenvironment on transplanted cells                                                            | c8161 cells showed an induction rate of 40%; c81-61 induction rate was significantly lower (8%); primary melanocytes showed no gene induction                                                                                                                     | <b>Fig. 2</b>    |
| <b>migrating cells to non-migrating cells (c8161)</b>                     | compare/contrast the neural crest migration program with melanoma migration to identify genes that may promote or inhibit melanoma migration | some genes implicated in neural crest migration are down-regulated, suggesting that migrating melanoma cells do not precisely replicate the neural crest program                                                                                                  | <b>Fig. 3B</b>   |
| <b>migrating lead cells to trailing cells (c8161)</b>                     | determine effects of changing micro-environments on migrating melanoma cells                                                                 | down-regulation of EMT and early migration markers ( <i>MYB</i> , <i>NEDD9</i> ) and the down-regulation of pluripotency markers ( <i>SOX2</i> , <i>NANOG</i> , and <i>NES</i> ) suggest dynamic gene regulation in response to changing micro-environmental cues | <b>Fig. 3B</b>   |
| <b>c8161 to host chick neural crest</b>                                   | directly compare/contrast gene expression in migrating c8161 cells compared to the chick neural crest cells                                  | some genes follow similar expression patterns while others do not, suggesting absolute adherence to the neural crest program is not a requirement for c8161 migration                                                                                             | <b>Fig. 4</b>    |
| <b>c8161 (aggressive melanoma) to primary melanocytes</b>                 | evaluate which aspects of the neural crest program are up-regulated in c8161 melanoma cells                                                  | c8161 cells aberrantly re-express neural crest-related genes associated with EMT and migration, while silencing genes associated with melanocyte differentiation                                                                                                  | <b>Fig. 5A,B</b> |
| <b>c8161 (aggressive melanoma) to c81-61 (poorly aggressive melanoma)</b> | evaluate which aspects of the neural crest program are up-regulated in c8161 melanoma cells                                                  | 14 genes displayed moderate expression changes in c81-61 cells compared to the overall significant changes observed in c8161 cells, suggesting their possible use as prognostic indicators                                                                        | <b>Fig. 5C</b>   |
